# Supplementary material
Source: PubMed Central journal article supplement (PMC4035926)
Supplement: 1402243111_pnas.201402243SI.pdf [file 1402243111_pnas.201402243SI.pdf]

# Supporting Information

Lee et al. 10.1073/pnas.1402243111

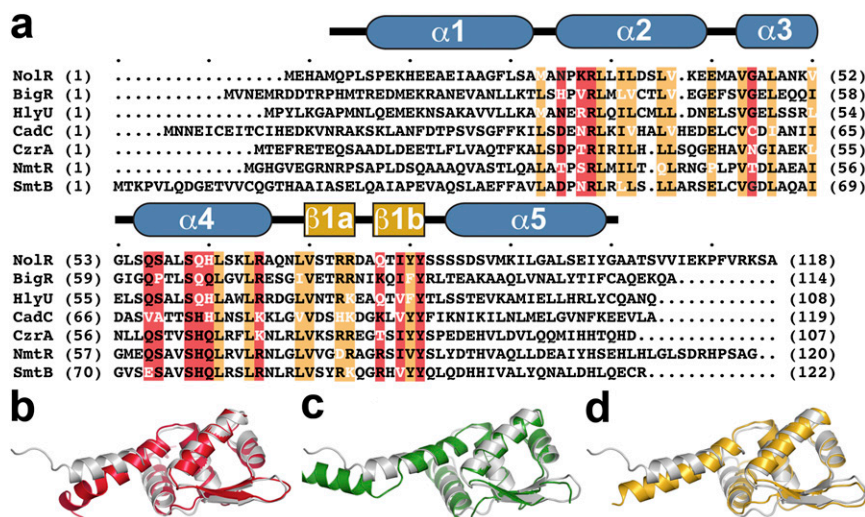

**Fig. S1.** Sequence and structure comparison of NoIR and ArsR/SmtB transcription factors. (A) Multiple amino acid sequence alignment of *Sinorhizobium fredii* NoIR (AAO27299.1), *Xylella fastidiosa* biofilm growth-associated repressor BigR (Q9PFB1.1), *Vibrio cholerae* HlyU (P52695.1), *Lactococcus lactis* CadC (POA4U3.1), *Bacillus subtilis* CzrA (O31844.1), *Mycobacterium tuberculosis* NmtR (O69711.3), and *Synechococcus elongatus* SmtB (P30340.1).  $\alpha$ -Helices (blue) and  $\beta$ -strands (gold) of NoIR are indicated above the alignment. Protein-DNA interaction residues are highlighted in red and other conserved residues are indicated in orange. (B–D) Pairwise structural comparisons of NoIR (gray) with (B) BigR (red, PDB ID code 3PQJ), (C) CadC (green, PDB ID code 3F72), and (D) HlyU (gold, PDB ID code 3JTH). Proteins structurally related to NoIR were identified using the DALI server ([http://ekhidna.biocenter.helsinki.fi/dali\\_server/](http://ekhidna.biocenter.helsinki.fi/dali_server/)) with overlays performed in COOT using the SSM Superimpose feature to align the models based on C $\alpha$  positions.

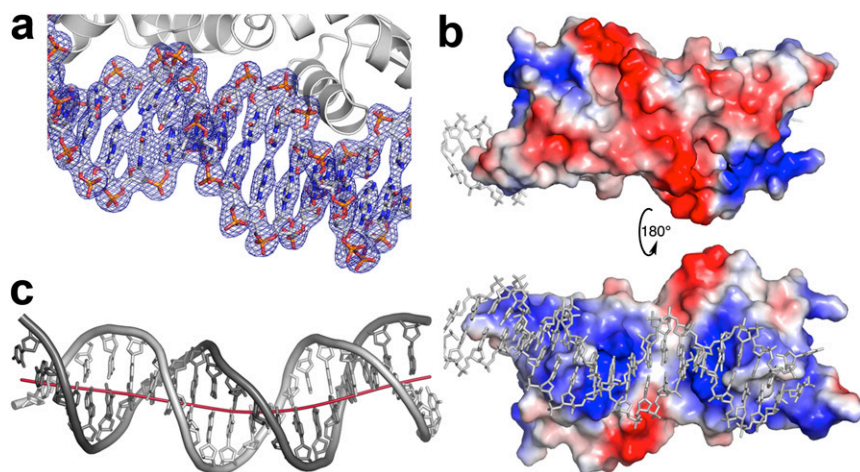

**Fig. S2.** Overview of DNA binding to NoIR. (A) Representative final electron density ( $2F_o - F_c$  map;  $1.5 \sigma$ ) of oligo AT bound to NoIR. (B) Electrostatic surface potential of NoIR. The surface of the homodimer is negatively charged (red) on the face opposite the DNA binding sites and presents a positively charged (blue) surface for interaction with DNA. Electrostatic surfaces were generated using the Adaptive Poisson-Boltzmann Server (APBS) program implemented in PyMOL. (C) NoIR binding results in  $16.8^\circ$  bend in the DNA duplex compared with ideal B-form DNA. The curvature of oligo AT (red line) bound to NoIR was calculated using 3D-DART.

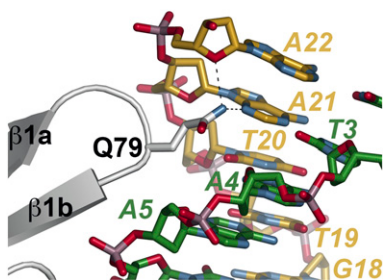

**Fig. S3.** Protein–DNA interaction in the minor groove of NoIR in complex with oligo AT DNA. Nucleotides of the 5' strand (gold) and 3' strand (green) are shown as stick models. Portions of the wing  $\beta$ -sheet are shown as a ribbon diagram with the side-chain of Gln79 shown as a stick model. Hydrogen bond interactions are indicated by dotted lines.

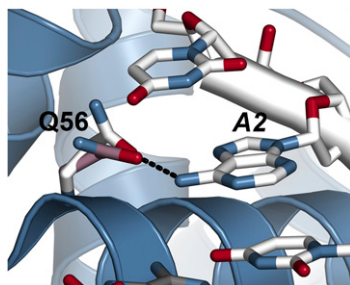

**Fig. S4.** Comparison of Gln56 positioning in the first interaction site of the NoIR oligo AT and oligo AA structures. The structures of NoIR in complex with oligos AT and AA were overlaid. The secondary structure features of the NoIR•oligo AT complex are shown (blue). The phosphate backbone and nucleotides of oligoAT are shown (white). The structure of NoIR complexed with oligo AA was similar and is not shown for clarity. The side-chain positions of Gln56 in the oligo AT (white) and oligo AA (rose) structures are shown as stick models. The hydrogen bond interaction between Gln56 and A2 is indicated by the dotted line.

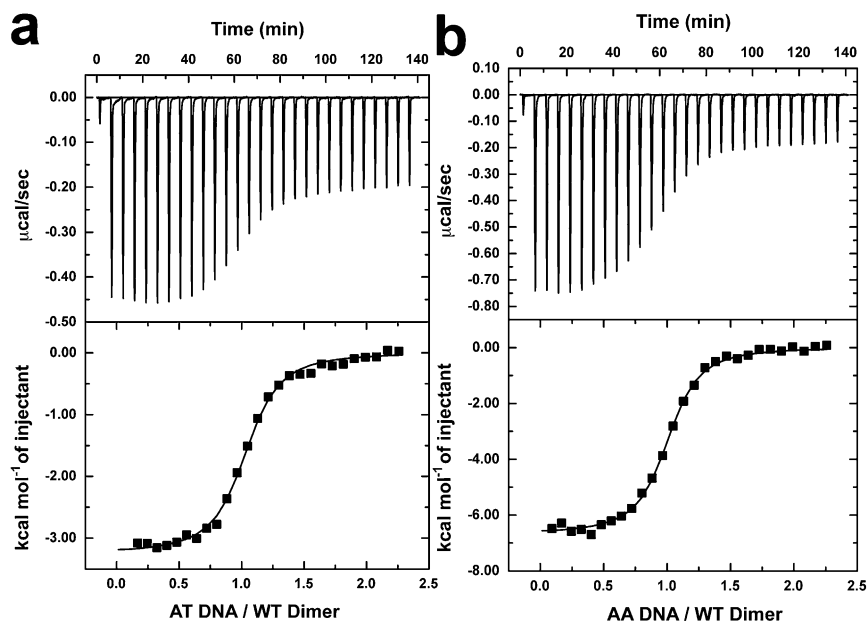

**Fig. S5.** Analysis of NoIR–DNA interaction by isothermal titration calorimetry. Titrations of the NoIR with (A) oligo AT and (B) oligo AA are shown. In each panel, the *Upper* window shows the isothermal titration calorimetry (ITC) data plotted as heat signal ( $\mu\text{cal}\cdot\text{s}^{-1}$ ) versus time (min) for interaction of NoIR with the DNA. The *Lower* window shows the integrated heat response per injection from titrations of NoIR, with DNA plotted as normalized heat per mole of injectant.

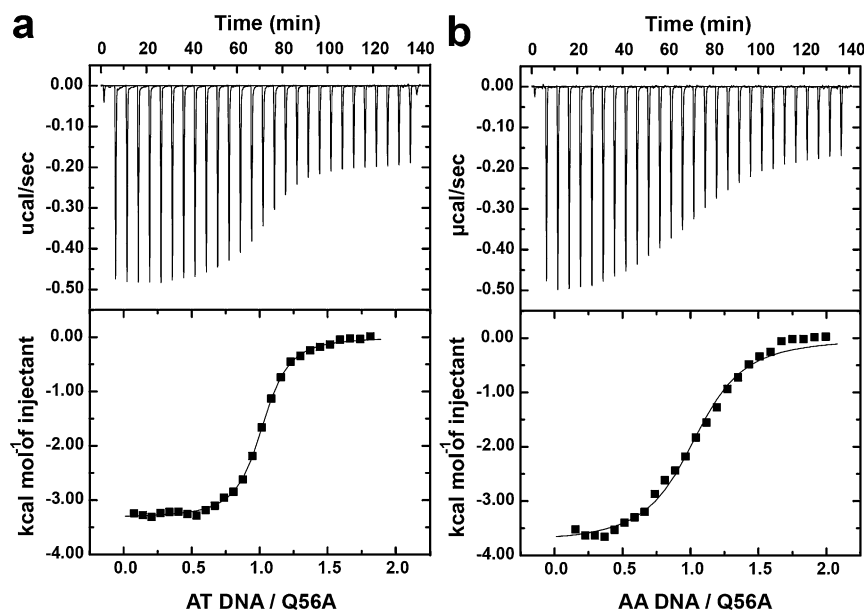

**Fig. S6.** Analysis of NoIR Q56A mutant DNA interaction by isothermal titration calorimetry. Titrations of the NoIR Q56A mutant with (A) oligo AT and (B) oligo AA are shown. In each panel, the *Upper* window shows the ITC data plotted as heat signal ( $\mu\text{cal}\cdot\text{s}^{-1}$ ) versus time (min) for interaction of NoIR Q56A with the DNA. The *Lower* window shows the integrated heat response per injection from titrations of NoIR Q56A, with DNA plotted as normalized heat per mole of injectant.

**Table S1.** Summary of crystallographic statistics

|                                                                | NoIR (SeMet) oligo<br>AT DNA                       | NoIR<br>uncomplexed                                                                       | NoIR oligo AA DNA                                  |
|----------------------------------------------------------------|----------------------------------------------------|-------------------------------------------------------------------------------------------|----------------------------------------------------|
| Data collection                                                |                                                    |                                                                                           |                                                    |
| Space group                                                    | P3 <sub>1</sub>                                    | C2                                                                                        | P3 <sub>1</sub>                                    |
| Cell dimensions                                                | $a = b = 131.0 \text{ \AA}, c = 67.69 \text{ \AA}$ | $a = 99.77 \text{ \AA}, a = 99.62 \text{ \AA}, c = 113.0 \text{ \AA}; \beta = 90.1^\circ$ | $a = b = 131.3 \text{ \AA}, c = 68.55 \text{ \AA}$ |
| Resolution, $\text{\AA}$ (highest shell)                       | 42.9–3.05 (3.10–3.05)                              | 37.4–2.65 (2.70–2.65)                                                                     | 30.4–3.00 (3.05–3.00)                              |
| Reflections (total/unique)                                     | 123,554/22,454                                     | 115,156/32,349                                                                            | 127,824/23,470                                     |
| Completeness, % (highest shell)                                | 91.7 (69.0)                                        | 99.4 (99.3)                                                                               | 89.2 (63.2)                                        |
| $\langle I/\sigma \rangle$ (highest shell)                     | 24.8 (4.6)                                         | 17.7 (2.2)                                                                                | 19.6 (2.0)                                         |
| $R_{\text{sym}}$ , % (highest shell)                           | 4.5 (19.8)                                         | 5.6 (44.5)                                                                                | 5.4 (54.9)                                         |
| Refinement                                                     |                                                    |                                                                                           |                                                    |
| $R_{\text{cryst}}/R_{\text{free}}$                             | 13.2/17.8                                          | 20.3/24.6                                                                                 | 18.5/21.0                                          |
| No. of protein atoms (dimers per asymmetric unit)              | 2,916 (2)                                          | 5,904 (4)                                                                                 | 2,924 (2)                                          |
| No. of water molecules                                         | 0                                                  | 270                                                                                       | 0                                                  |
| No. of DNA atoms                                               | 1,734                                              | —                                                                                         | 1,734                                              |
| rmsd, bond lengths, $\text{\AA}$                               | 0.011                                              | 0.007                                                                                     | 0.005                                              |
| rmsd, bond angles, $^\circ$                                    | 1.45                                               | 1.11                                                                                      | 0.860                                              |
| Avg B-factor, $\text{\AA}^2$ (protein, DNA, water)             | 116.5, 122.1, —                                    | 44.8, —, 37.7                                                                             | 76.0, 83.1, —                                      |
| Stereochemistry, % (most favored, allowed, generously allowed) | 96.6, 3.4, 0.0                                     | 98.4, 1.6, 0.0                                                                            | 95.3, 4.7, 0.0                                     |

**Table S2. Sequence comparison of NolR operator sequences**

| Gene/operon | Sequence                                               | Accession code |
|-------------|--------------------------------------------------------|----------------|
| oligoAT     | T <b><u>ATTAG</u></b> AGAACCCT <b><u>GAAG</u></b> TTAA | AF040724.1     |
| oligoAA     | T <b><u>ATTAG</u></b> AGAACCCT <b><u>GATG</u></b> TTAA | NA/this work   |
| nodD1       | <b><u>CGTTAG</u></b> AAAGCGCT <b><u>TAAT</u></b> TAAT  | AY198324.2     |
| nodZ        | <b><u>CATTAG</u></b> GAAGCTCT <b><u>GAAT</u></b> TGAT  | AF072888.1     |
| nolR        | <b><u>ATTAG</u></b> ACGTGATG <b><u>CATA</u></b> AAAAG  | AY194594.1     |
| nodABC      | T <b><u>ATTAG</u></b> AAGATGCT <b><u>CACG</u></b> TTTG | AJ302672.1     |
| ttsI        | <b><u>ATTAG</u></b> GATTGGGT <b><u>AATA</u></b> GTCA   | AF229441.2     |

Nucleotides in bold correspond to positions that interact with NolR in the crystal structure. Underlined nucleotides correspond to those positions identified by Vinardell et al. (1) as part of the NolR consensus motif.

1. Vinardell JM, et al. (2004) NolR regulates diverse symbiotic signals of *Sinorhizobium fredii* HH103. *Mol Plant Microbe Interact* 17(6):676–685.
